# Supplementary material for: HER2-Specific Peptide (LTVSPWY) and Antibody (Herceptin) Targeted Core Cross-Linked Micelles for Breast Cancer: A Comparative Study
Source: MDPI journal article supplement (doi:10.3390/pharmaceutics15030733), 2023-02-22
Supplement: s1 [file s1]

**HER2-specific peptide and antibody (Herceptin) targeted core cross-linked micelles for breast cancer: A comparative study**

*Nazende Nur Bayram<sup>1</sup>, Gizem Tuğçe Ulu<sup>2</sup>, Nusaibah Abdulsalam Abdulhadi<sup>2</sup>, Seda Gurdap<sup>1</sup>, İsmail Alper İšoğlu<sup>1</sup>, Yusuf Baran<sup>2</sup>, Sevil Dinçer İšoğlu<sup>1\*</sup>*

<sup>1</sup>Department of Bioengineering, Faculty of Life and Natural Sciences, Abdullah Gül University, Kayseri, Turkey

<sup>2</sup>Molecular Biology and Genetics, Faculty of Science, İzmir Institute of Technology, İzmir, Turkey

*\*sevil.dincer@aqu.edu.tr, corresponding author*

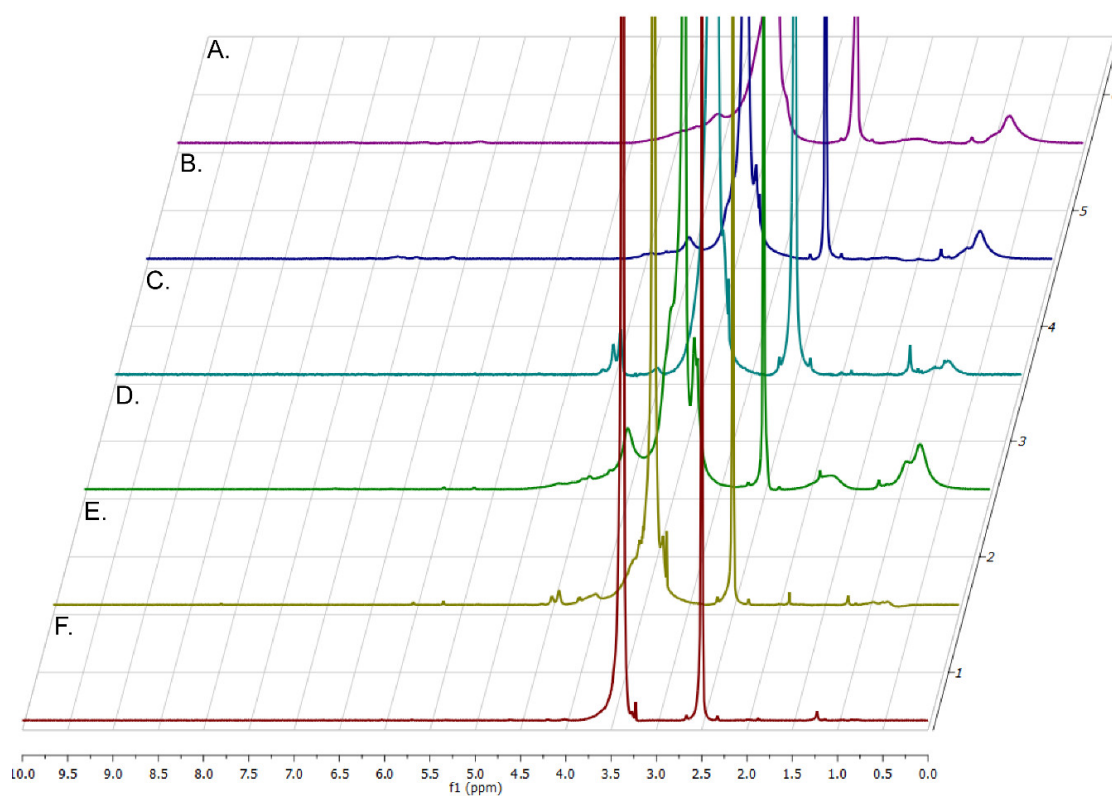

**Figure S1.**  $^1\text{H}$  NMR of AC1(A), AC2(B), AC3(C), AC4(D), AC5(E), and CCMs(F) in DMSO.

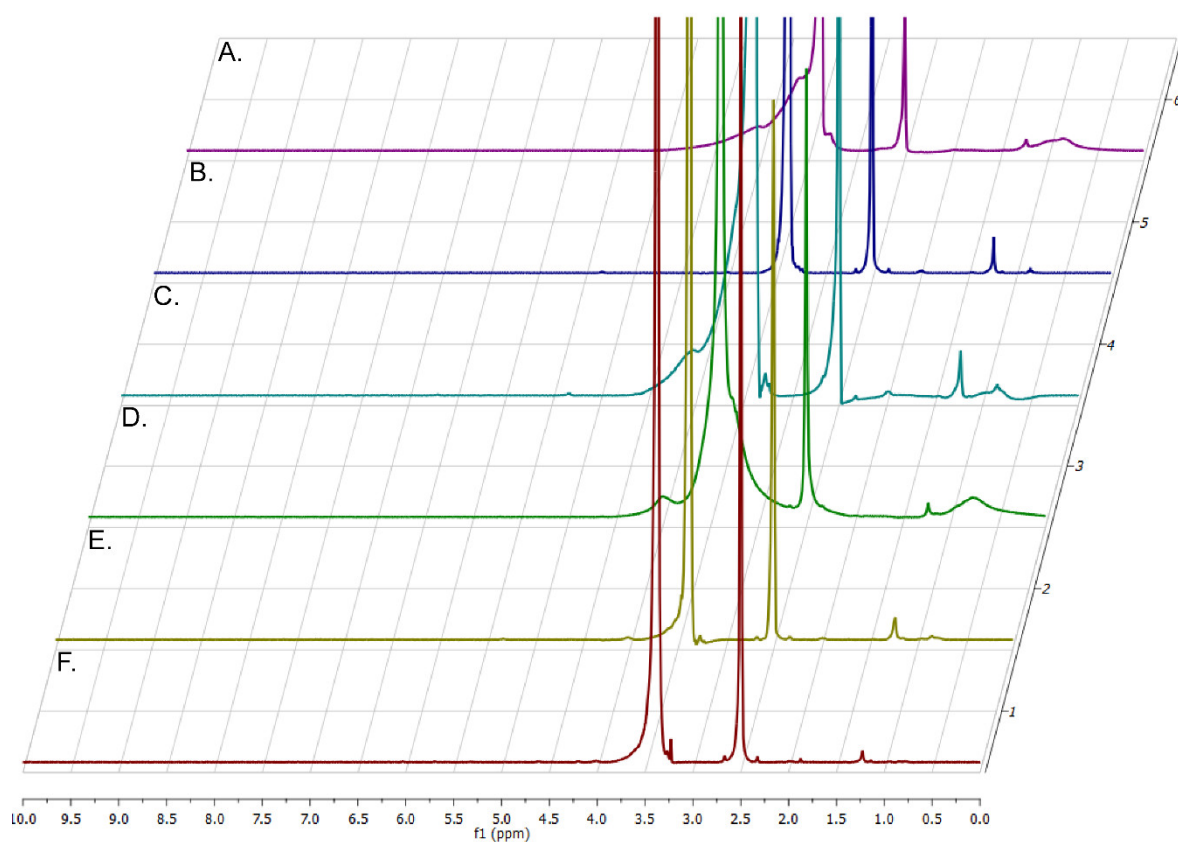

**Figure S2.**  $^1\text{H}$  NMR of PC1(A), PC2(B), PC3(C), PC4(D), PC5(E), and CCMs(F) in DMSO.

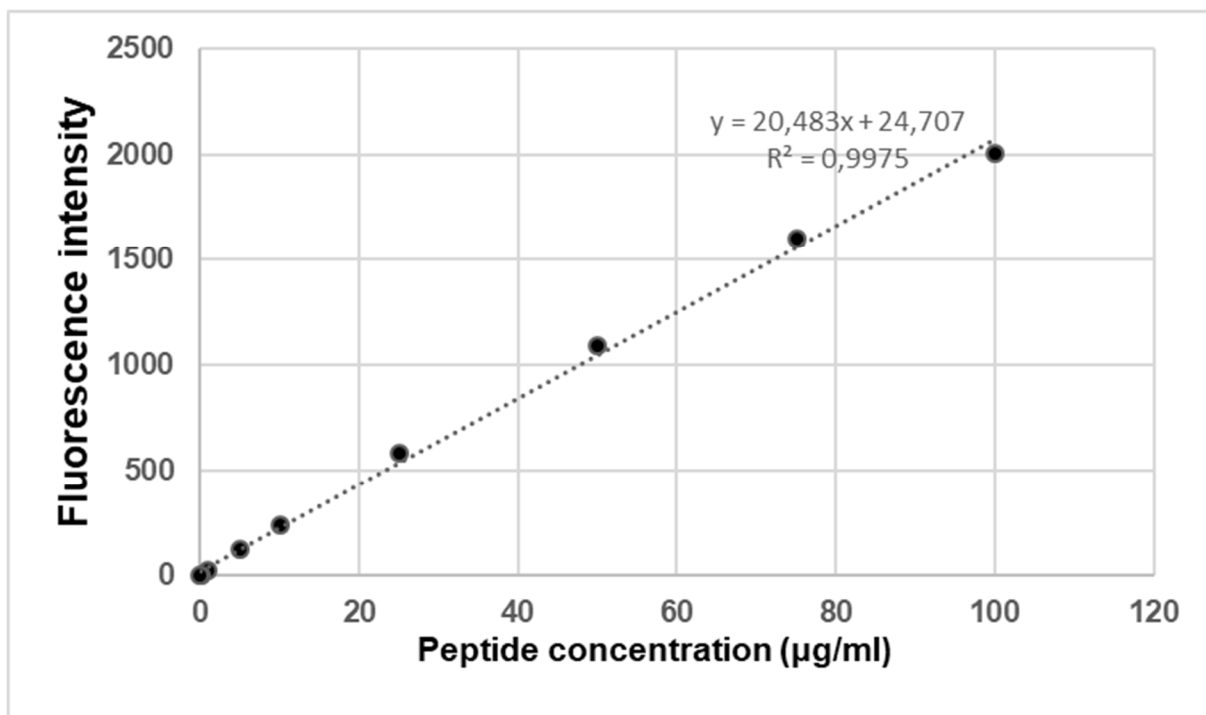

**Figure S3.** Calibration graph of LTVSPWY peptide in DMSO.

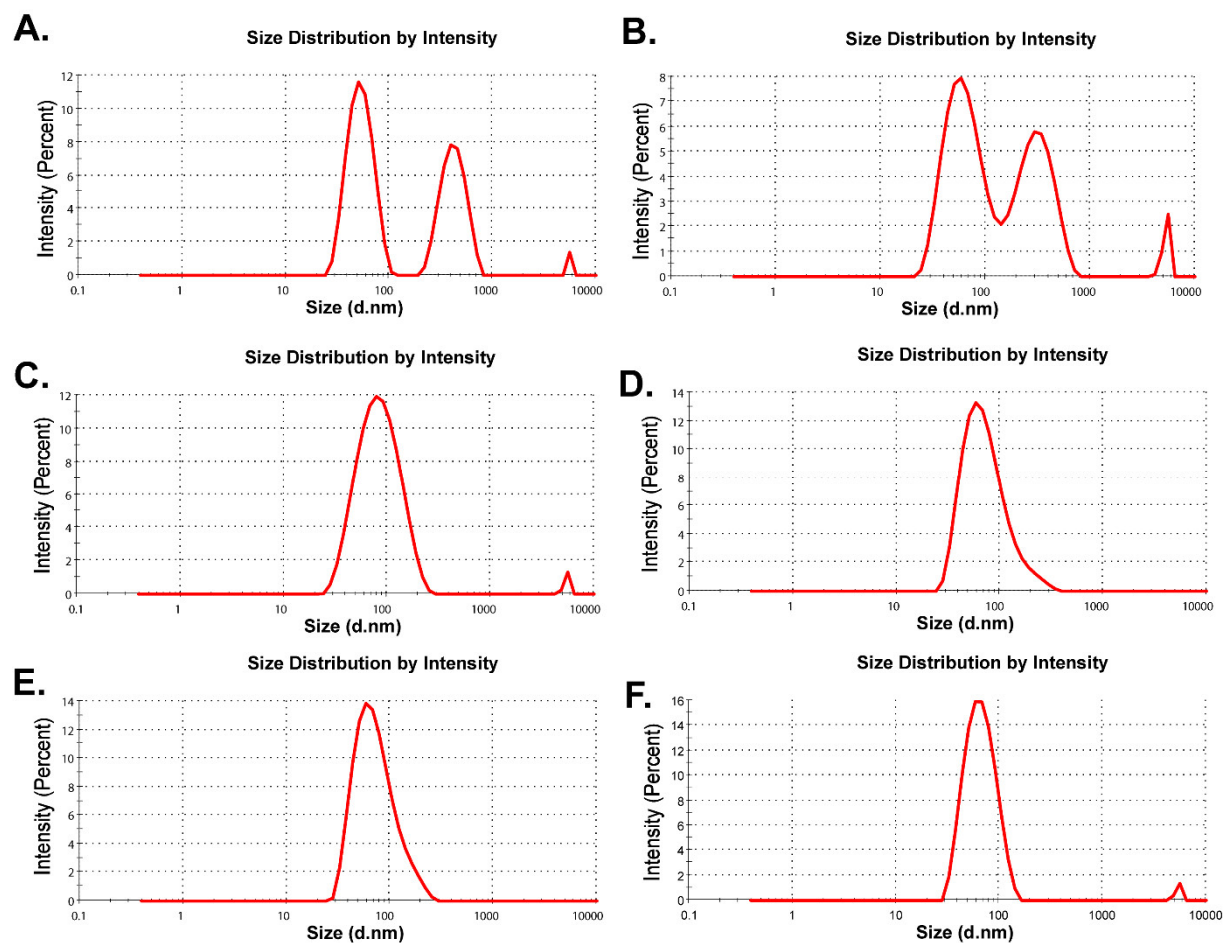

**Figure S4.** Size distributions of AC1(A) AC2(B) AC3(C) AC4(D) AC5(E) CCMs(F).

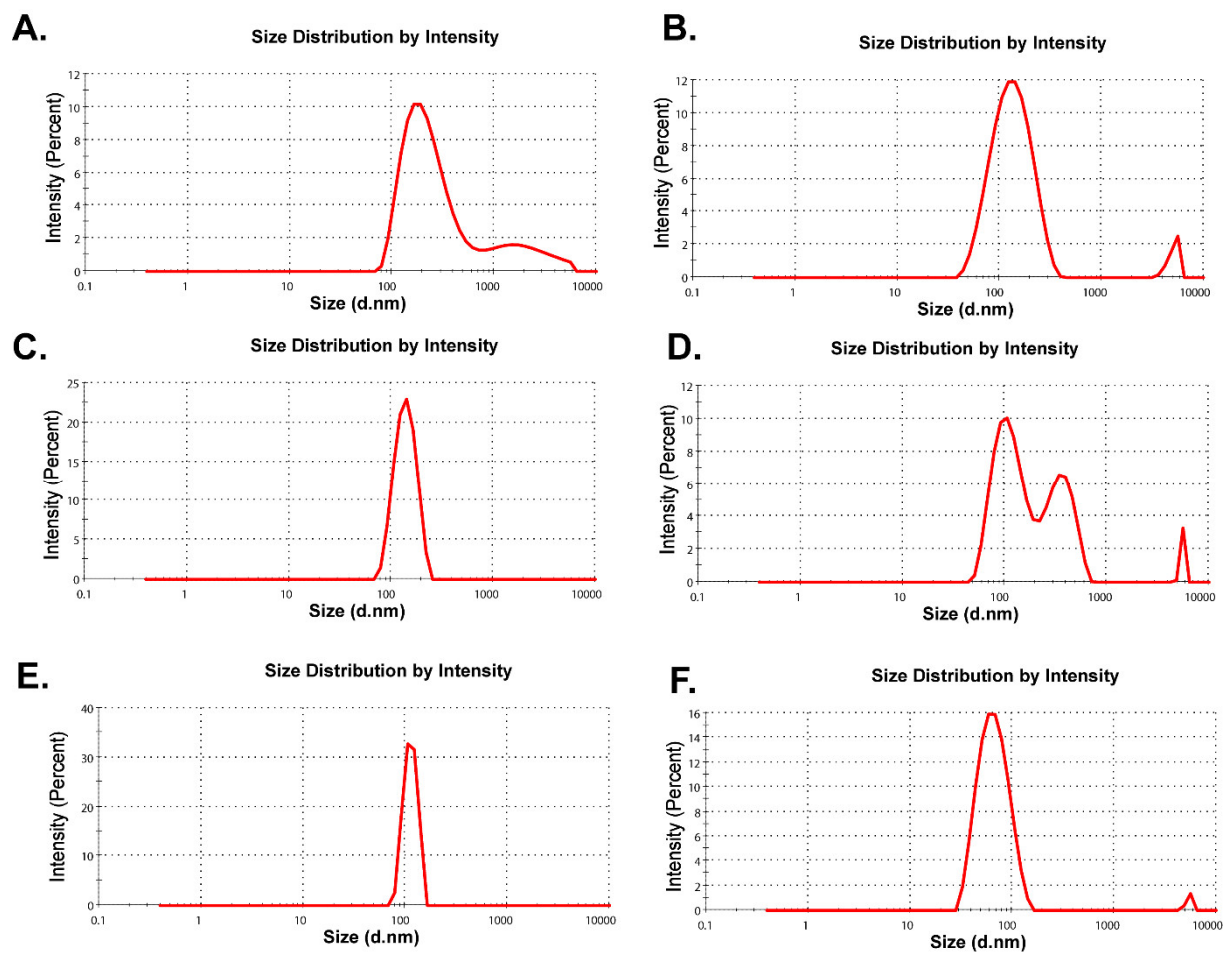

**Figure S5.** Size distributions of PC1(A) PC2(B) PC3(C) PC4(D) PC5(E) CCMs(F).

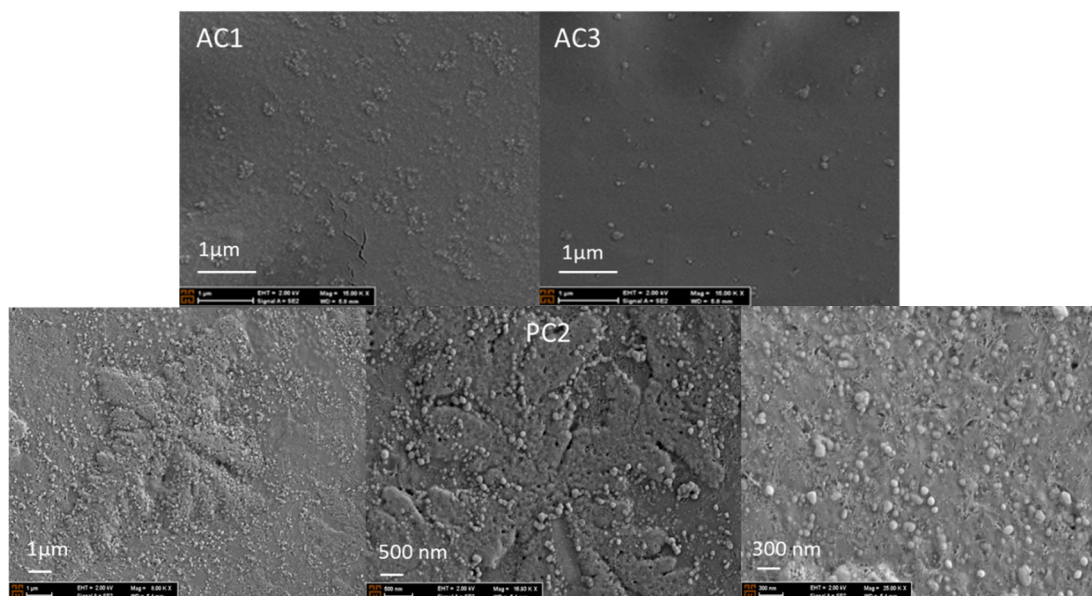

**Figure S6.** SEM images of selected samples (AC1, AC3, and PC2) from peptide and antibody-conjugated micelles.

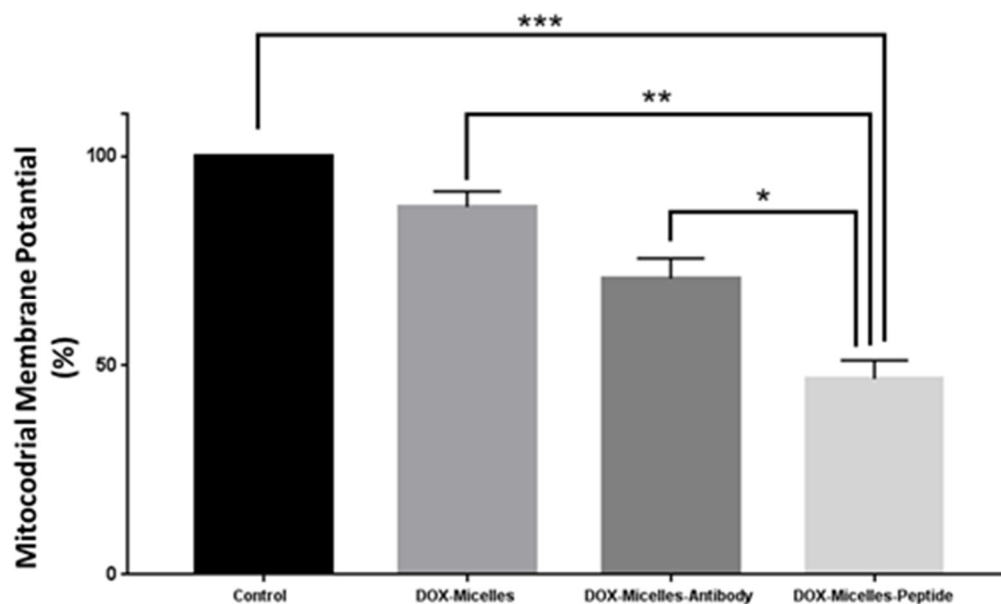

**Figure S7.** Determination of apoptotic effects with the mitochondrial membrane potential role of the IC50-loaded DOX molecule-loaded, DOX-molecule-loaded HER2 targeting peptide (LTVSPWY) and monoclonal antibody (Herceptin®) on the SKBR-3 breast cancer cells after 48 hours of incubation.

**Supplementary methods:** Different concentrations of CCMs were applied to the cells into 96 well-plates (Black cell culture plate). After 48 hours of incubation, 10µl JC-1 staining solution (Caymanchem) was added to each well and mixed gently. The plate was incubated in an incubator with 5% CO<sub>2</sub> at 37 °C for 30 minutes. After incubation, the plate was centrifuged, and the supernatant was aspirated. 200µl of Assay buffer was added to each well. JC-1 aggregates for healthy cells and monomers for dead cells were determined for excitation and emission at 535 nm and 595, 485, and 535 nm, respectively. The ratio of JC-1 aggregates to JC-1 monomers was used to determine mitochondrial activity.
